# Supplementary material
Source: Elsevier journal article supplement (https://sonel.ru/common/files/sertification/sert-pattern-approval-reference-equipment/mmc1.pdf)
Supplement: mmc1 [file mmc1.pdf]

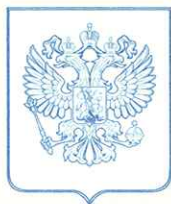

ФЕДЕРАЛЬНОЕ АГЕНТСТВО  
ПО ТЕХНИЧЕСКОМУ РЕГУЛИРОВАНИЮ И МЕТРОЛОГИИ

# СЕРТИФИКАТ

об утверждении типа средств измерений

## PATTERN APPROVAL CERTIFICATE OF MEASURING INSTRUMENTS

RU.C.34.010.A

№ 31205

Действителен до  
" 01 " мая 2013  
..... г.

Настоящий сертификат удостоверяет, что на основании положительных результатов испытаний утвержден тип магазинов мер сопротивлений петли короткого замыкания ММС-1 ,  
наименование средства измерений

ООО "СОНЭЛ", г.Москва ,

наименование предприятия-изготовителя

который зарегистрирован в Государственном реестре средств измерений под № **37541-08** и допущен к применению в Российской Федерации.

Описание типа средства измерений приведено в приложении к настоящему сертификату.

Заместитель  
Руководителя

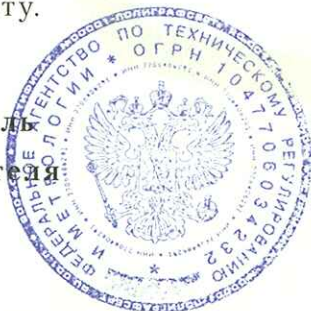

**В.Н.Крутиков**

" 30 " 04 2008 г.

Заместитель  
Руководителя

Продлен до

" ..... " ..... г.

" ..... " ..... 200 г.
